# Supplementary material
Source: PubMed Central journal article supplement (PMC2930733)
Supplement: supp_M110.115634_jbc.M110.115634-1.pdf [file supp_M110.115634_jbc.M110.115634-1.pdf]

## Suppl. Figure 1

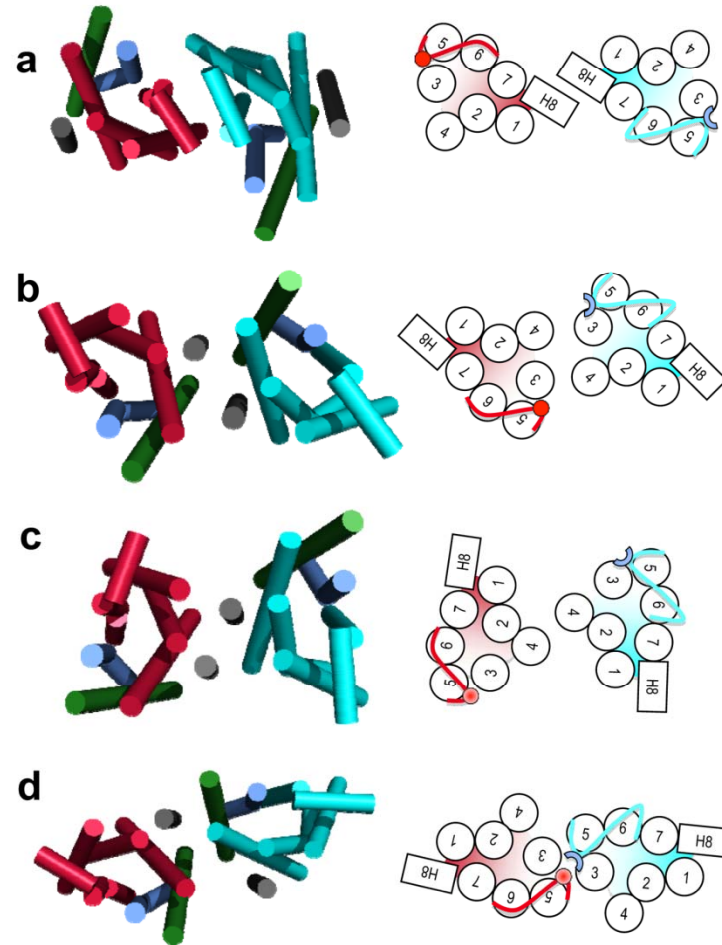

Cytoplasmic view (left) and cartoon of this footprint (right) of the CB<sub>1</sub> (in red) and D<sub>2</sub> (in cyan) receptor heterodimer involving the TM1-TM1 (a), TM4-TM4<sup>invago</sup> (b), TM4-TM4<sup>ago</sup> (c), or TM5-TM5 (d) interfaces (see Methods). Red and cyan solid lines symbolize IL3 of CB<sub>1</sub> (29 amino acids long) or D<sub>2</sub> (142 amino acids long) receptors, respectively, which were not modeled. The red sphere represents Thr<sub>321</sub>-Ser<sub>322</sub> of CB<sub>1</sub>; and the blue half circle represents <sub>266</sub>NRRRVEAARR<sub>275</sub> of the D<sub>2</sub> receptor. Please note that the direction of the sphere and half circle within IL3 is totally arbitrary. Helices are shown as cylinders with the following color codes: TM4 in gray, TM5 in green, TM6 in blue, and the other helices in red for CB<sub>1</sub> and cyan for D<sub>2</sub> receptors.

## Suppl. Figure 2

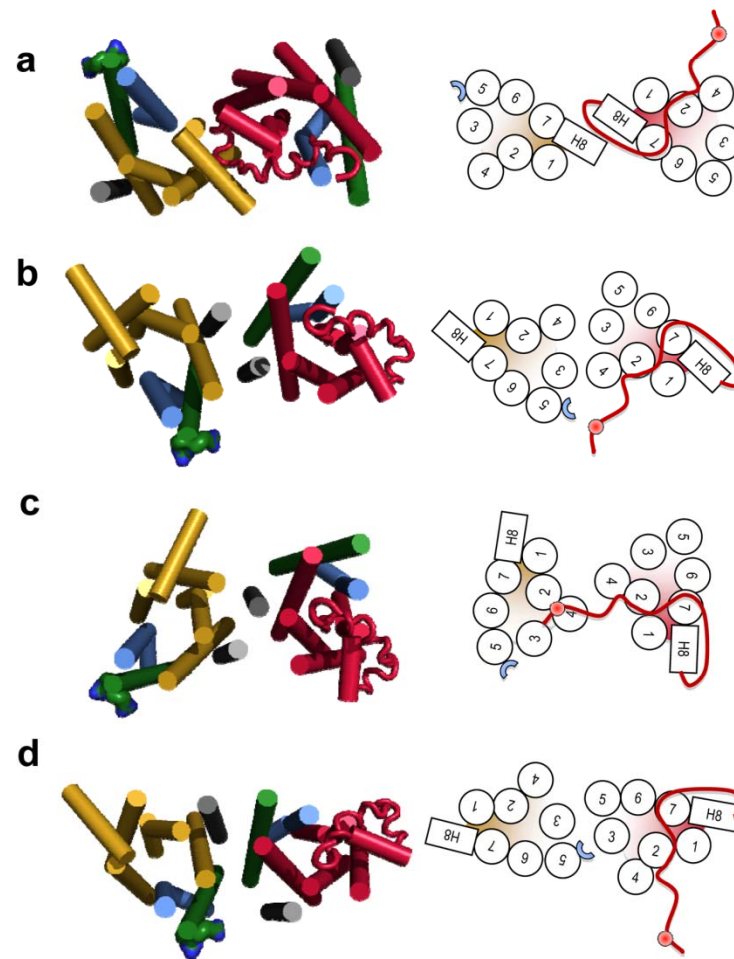

Cytoplasmic view (left) and cartoon of this footprint (right) of the CB<sub>1</sub> (in red) and A<sub>2A</sub> (in gold) receptor heterodimer involving the TM1-TM1 (a), TM4-TM4<sup>invago</sup> (b), TM4-TM4<sup>ago</sup> (c), or TM5-TM5 (d) interfaces (see Methods). Red solid line represents CT of the CB<sub>1</sub> receptor, which was arbitrarily modeled as in squid rhodopsin, red sphere represents Thr<sub>467</sub>(CT)-Ser<sub>468</sub>(CT) of CB<sub>1</sub>; and blue half circle represents Arg<sub>206</sub>(5.67) of the A<sub>2A</sub> receptor. Helices are shown as cylinders with the following color codes: TM4 in gray, TM5 in green, TM6 in blue, and the other helices in red for CB<sub>1</sub> and gold for A<sub>2A</sub> receptors.
