# Supplementary material
Source: PubMed Central journal article supplement (PMC2930733)
Supplement: supp_M110.115634_jbc.M110.115634-2.pdf [file supp_M110.115634_jbc.M110.115634-2.pdf]

**Supplementary Table I. Interspecies comparison of the A<sub>2A</sub>, D<sub>2</sub> and CB<sub>1</sub> receptor epitopes**

| <b>A<sub>2A</sub> receptor 5TM</b> |                          |                 |                    |
|------------------------------------|--------------------------|-----------------|--------------------|
| <b>Species</b>                     | <b>Sequence</b>          | <b>Residues</b> | <b>Accession #</b> |
| Human                              | LRIFLAARR                | 198-206         | P29274             |
| Dog                                | LRIFLAARR                | 198-206         | P11617             |
| Horse                              | LRIFLAARR                | 198-206         | Q6TLI7             |
| Bovine                             | LRIFLAARR                | 195-203         | IPI00716182        |
| Guinea pig                         | LRIFLAARR                | 195-203         | P46616             |
| Rat                                | LRIFLAARR                | 193-201         | P30543             |
| Mouse                              | LRIFLAARR                | 193-201         | Q60613             |
| <b>A<sub>2A</sub> receptor CT</b>  |                          |                 |                    |
| <b>Species</b>                     | <b>Sequence</b>          | <b>Residues</b> | <b>Accession #</b> |
| Human                              | SAQE <sub>p</sub> SQGNT  | 370-378         | P29274             |
| Dog                                | IAPE <sub>p</sub> SHGDM  | 370-378         | P11617             |
| Horse                              | SARE <sub>p</sub> SPGDT  | 370-378         | Q6TLI7             |
| Bovine                             | GARG <sub>p</sub> SQRDA  | 366-374         | IPI00716182        |
| Guinea pig                         | SAQR <sub>p</sub> SHGDA  | 367-375         | P46616             |
| Rat                                | SAQG <sub>p</sub> SPRDV  | 365-373         | P30543             |
| Mouse                              | STQG <sub>p</sub> SPGDV  | 365-373         | Q60613             |
| <b>D<sub>2</sub> receptor 5TM</b>  |                          |                 |                    |
| <b>Species</b>                     | <b>Sequence</b>          | <b>Residues</b> | <b>Accession #</b> |
| Human                              | VLRRRRKRVN               | 215-224         | P14416             |
| Monkey                             | VLRRRRKRVN               | 215-224         | P52702             |
| Bovine                             | VLRRRRKRVN               | 215-224         | P20288             |
| Dog                                | VLRRRRKRVN               | 215-224         | Q9GJU1             |
| Mouse                              | VLKRRKRVN                | 215-224         | P61168             |
| Rat                                | VLKRRKRVN                | 215-224         | P61169             |
| Ferret                             | VLKRRKRVN                | 215-224         | Q6TLI9             |
| <b>D<sub>2</sub> receptor IL3</b>  |                          |                 |                    |
| <b>Species</b>                     | <b>Sequence</b>          | <b>Residues</b> | <b>Accession #</b> |
| Human                              | NRRRVEAARR               | 266-275         | P14416             |
| Monkey                             | NRRRVEAARR               | 266-275         | P52702             |
| Bovine                             | NRRRVEAARR               | 266-275         | P20288             |
| Dog                                | NRRRVEAARR               | 266-275         | Q9GJU1             |
| Mouse                              | NRRRMDAARR               | 266-275         | P61168             |
| Rat                                | NRRRMDAARR               | 266-275         | P61169             |
| Ferret                             | NRRRVEAARR               | 266-275         | Q6TLI9             |
| <b>CB<sub>1</sub> receptor IL3</b> |                          |                 |                    |
| <b>Species</b>                     | <b>Sequence</b>          | <b>Residues</b> | <b>Accession #</b> |
| Human                              | <sub>p</sub> TpSEDGKVQVT | 321-330         | P21554             |
| Chimpanzee                         | <sub>p</sub> TpSEDGKVQVT | 321-330         | Q5IS73             |
| Mouse                              | <sub>p</sub> TpSEDGKVQVT | 322-331         | P47746             |
| Rat                                | <sub>p</sub> TpSEDGKVQVT | 322-331         | P20272             |
| Cat                                | <sub>p</sub> TpSEDGKVQVT | 321-330         | O02777             |
| Frog                               | <sub>p</sub> TpSEDGKVHIT | 321-330         | Q801M1             |
| Fish                               | <sub>p</sub> SpTEDGKVQIT | 323-332         | P56971             |

| <b>CB<sub>1</sub> receptor CT</b> |                 |                 |                    |
|-----------------------------------|-----------------|-----------------|--------------------|
| <b>Species</b>                    | <b>Sequence</b> | <b>Residues</b> | <b>Accession #</b> |
| Human                             | SVSTDpTpSAE     | 462-470         | P21554             |
| Chimpanzee                        | SVSTDpTpSAE     | 462-470         | Q5IS73             |
| Mouse                             | SVSTDpTpSAE     | 463-471         | P47746             |
| Rat                               | SVSTDpTpSAE     | 463-471         | P20272             |
| Cat                               | SVSTNpTpSAK     | 462-470         | O02777             |
| Frog                              | SVSTDpTpSAE     | 460-468         | Q801M1             |
| Fish                              | SVSTDpTpTAE     | 463-471         | P56971             |
